# Supplementary material
Source: publisher site journal article supplement (https://www.dovepress.com/get_supplementary_file.php?f=273363.docx)

Supplement 1: ICU adequacy assessment


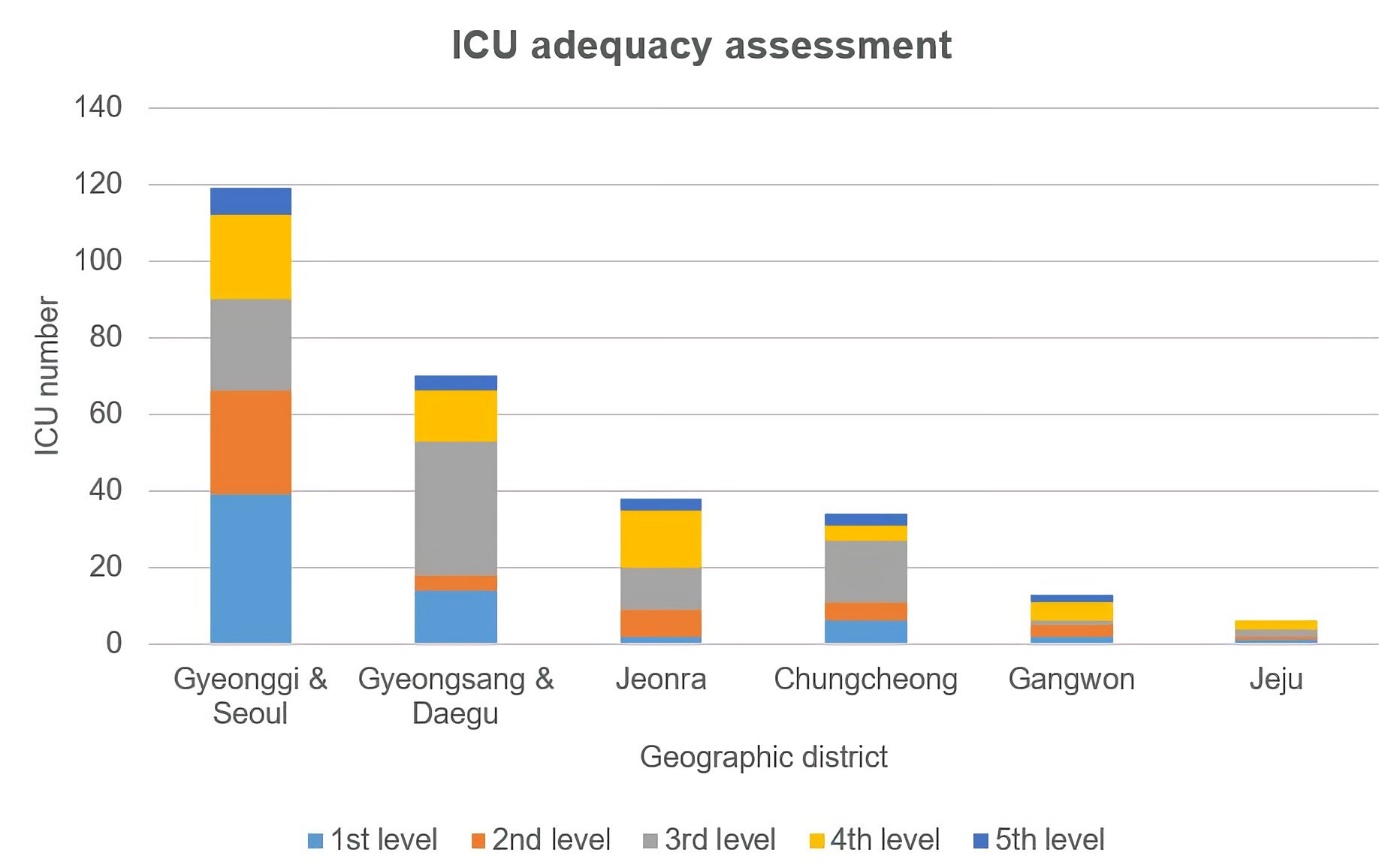

Supplement: Supplementary file 2 [file get_supplementary_file.php]
